# Supplementary material
Source: PubMed Central journal article supplement (PMC6056862)

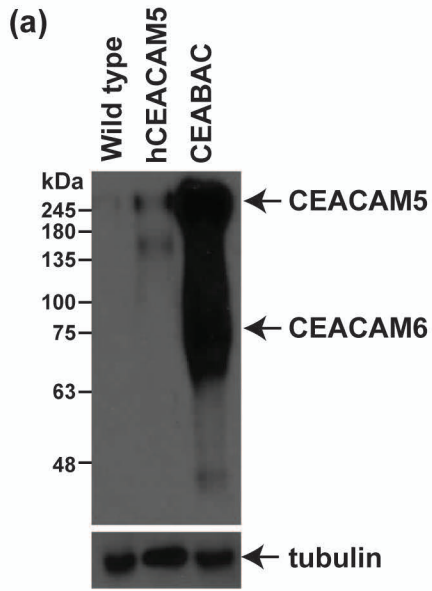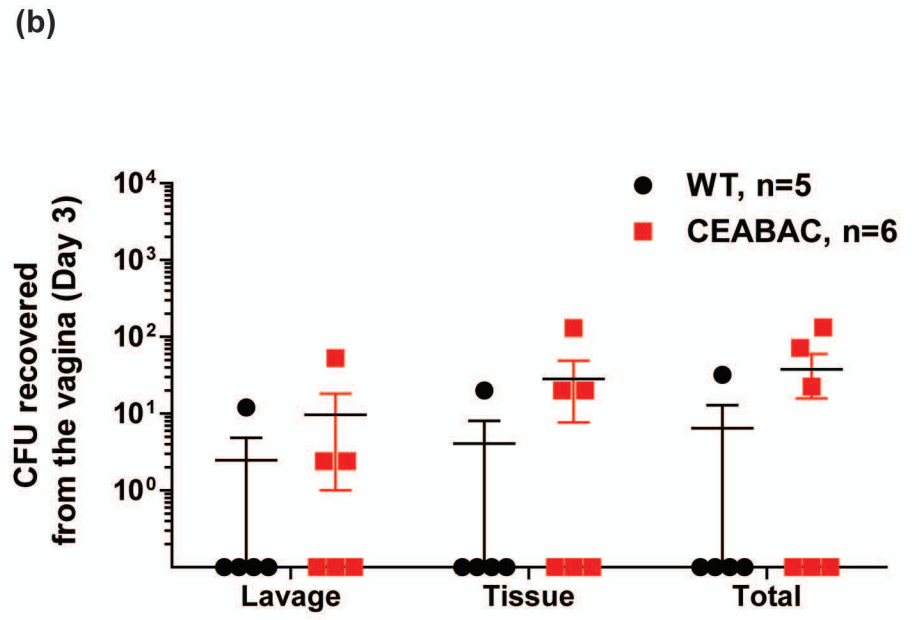

Supplement: IAI.00092-18_zii999092470s2.pdf [file IAI.00092-18_zii999092470s2.pdf]

(a)

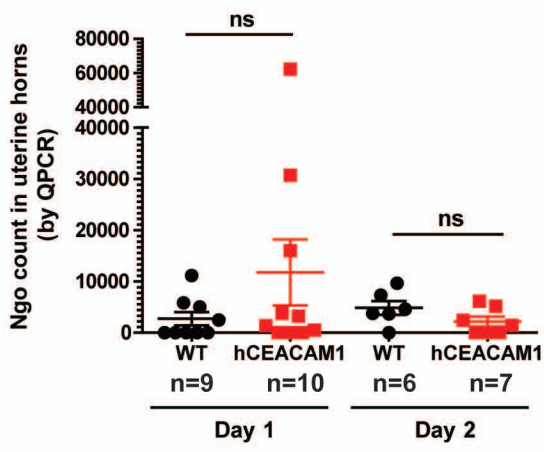

(b)

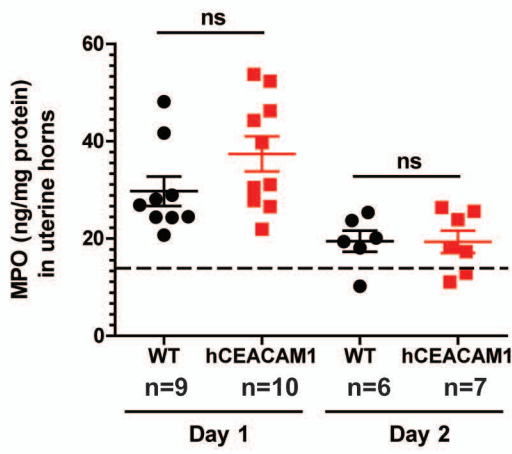

(c)

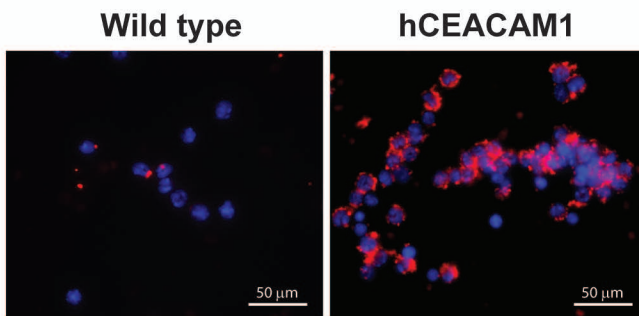

Supplement: IAI.00092-18_zii999092470s3.pdf [file IAI.00092-18_zii999092470s3.pdf]

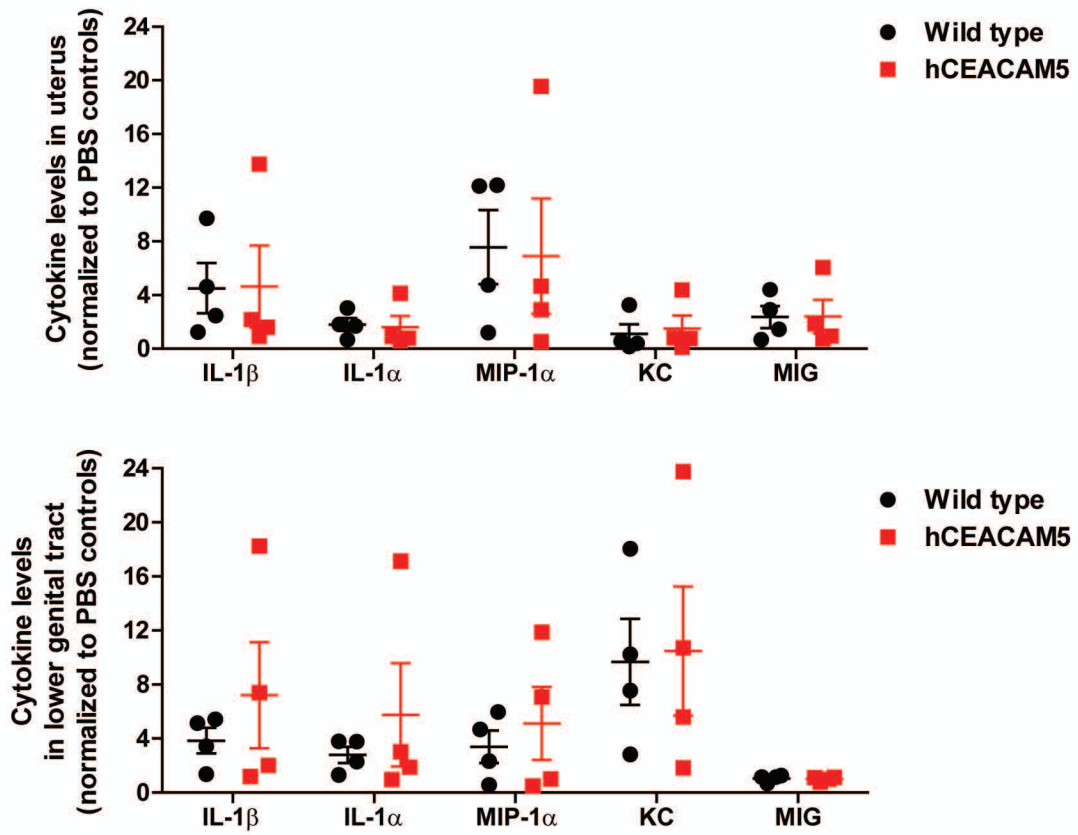

Supplement: IAI.00092-18_zii999092470s4.pdf [file IAI.00092-18_zii999092470s4.pdf]

**(a)**

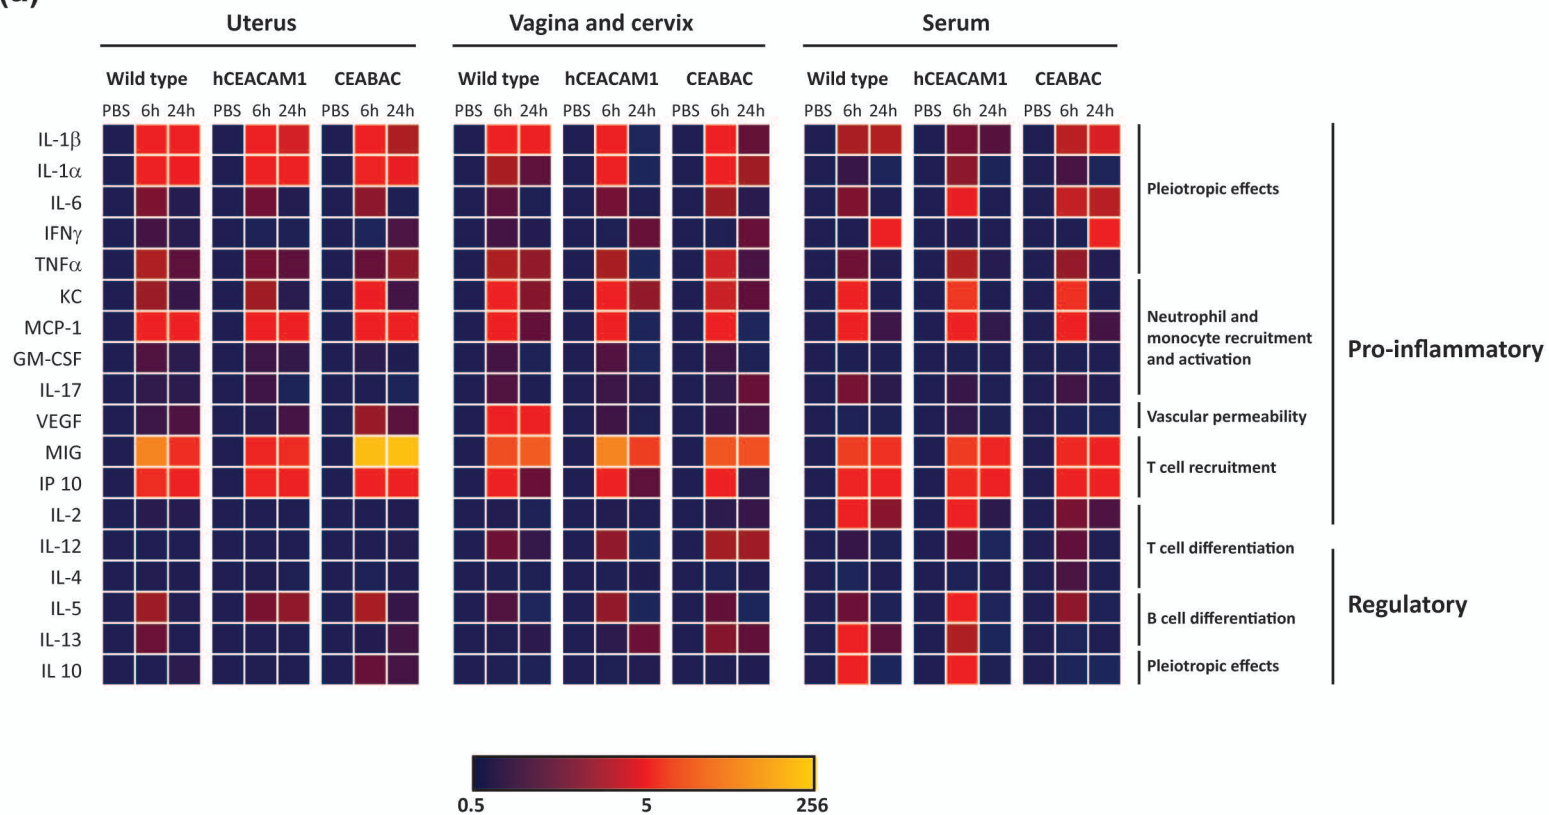

**(b)**

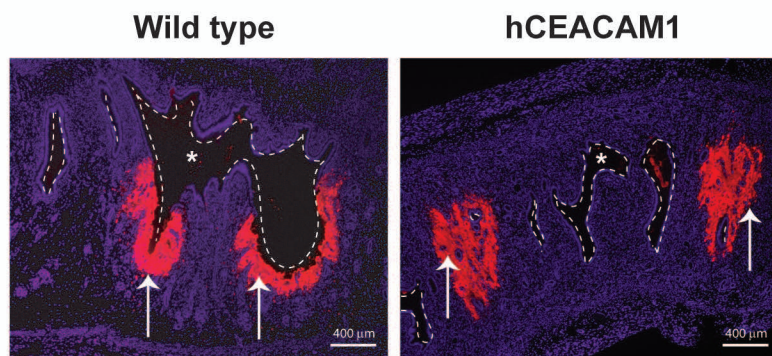

(c)

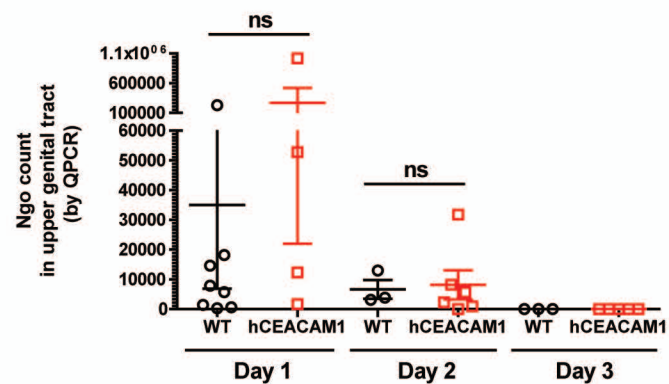

Supplement: IAI.00092-18_zii999092470s5.pdf [file IAI.00092-18_zii999092470s5.pdf]
